# Supplementary material
Source: bioRxiv or medRxiv preprint supplement (https://www.medrxiv.org/highwire/filestream/79660/field_highwire_adjunct_files/1/2020.04.15.20066407-2.pdf)
Supplement: Supplementary file [file 2020.04.15.20066407-2.pdf]

**Table: STARD checklist (2015); essential items for reporting diagnostic accuracy studies**

| Section and topic        | No | Item                                                                                                                                                  | Inclusion in manuscript                                                                                                                    |
|--------------------------|----|-------------------------------------------------------------------------------------------------------------------------------------------------------|--------------------------------------------------------------------------------------------------------------------------------------------|
| <b>Title or abstract</b> |    |                                                                                                                                                       |                                                                                                                                            |
|                          | 1  | Identification as a study of diagnostic accuracy using at least one measure of accuracy (such as sensitivity, specificity, predictive values, or AUC) | Defined in objectives section in structured abstract                                                                                       |
| <b>Abstract</b>          |    |                                                                                                                                                       |                                                                                                                                            |
|                          | 2  | Structured summary of study design, methods, results, and conclusions (for specific guidance, see STARD for Abstracts)                                | Structured abstract provided, including required sub-sections                                                                              |
| <b>Introduction</b>      |    |                                                                                                                                                       |                                                                                                                                            |
|                          | 3  | Scientific and clinical background, including the intended use and clinical role of the index test                                                    | Described in introduction, paragraph 3                                                                                                     |
|                          | 4  | Study objectives and hypotheses                                                                                                                       | Described in final paragraph of introduction                                                                                               |
| <b>Methods</b>           |    |                                                                                                                                                       |                                                                                                                                            |
| Study design             | 5  | Whether data collection was planned before the index test and reference standard were performed (prospective study) or after (retrospective study)    | Samples stratified based on timing of collection, and retrospectively based on RT-PCR diagnosis; described in 'samples' section of methods |
| Participants             | 6  | Eligibility criteria                                                                                                                                  | Sample selection described in 'samples' section of methods                                                                                 |
|                          | 7  | On what basis potentially eligible participants were identified (such as symptoms, results from previous tests, inclusion in registry)                | Description of RT-PCR in paragraph 2 of results                                                                                            |

| Section and topic | No  | Item                                                                                                                                                   | Inclusion in manuscript                                                                                                            |
|-------------------|-----|--------------------------------------------------------------------------------------------------------------------------------------------------------|------------------------------------------------------------------------------------------------------------------------------------|
|                   | 8   | Where and when potentially eligible participants were identified (setting, location, and dates)                                                        | Provided in methods                                                                                                                |
|                   | 9   | Whether participants formed a consecutive, random, or convenience series                                                                               | Provided in methods                                                                                                                |
| Test methods      | 10a | Index test, in sufficient detail to allow replication                                                                                                  | Provided in Supplementary Materials                                                                                                |
|                   | 10b | Reference standard, in sufficient detail to allow replication                                                                                          | Provided in Supplementary Materials                                                                                                |
|                   | 11  | Rationale for choosing the reference standard (if alternatives exist)                                                                                  | RT-PCR is widespread reference standard with no relevant alternatives                                                              |
|                   | 12a | Definition of and rationale for test positivity cut-offs or result categories of the index test, distinguishing pre-specified from exploratory         | Provided in methods and results (including Figure 2)                                                                               |
|                   | 12b | Definition of and rationale for test positivity cut-offs or result categories of the reference standard, distinguishing pre-specified from exploratory | Provided in Supplementary Materials                                                                                                |
|                   | 13a | Whether clinical information and reference standard results were available to the performers or readers of the index test                              | Clinical information not available to performers or readers of ELISA or lateral flow assays                                        |
|                   | 13b | Whether clinical information and index test results were available to the assessors of the reference standard                                          | Clinical information not available to performers or readers or RT-PCR                                                              |
| Analysis          | 14  | Methods for estimating or comparing measures of diagnostic accuracy                                                                                    | Sensitivity, specificity, positive and negative predictive value, and other statistical tests included in methods and in Fig 1D,E) |
|                   | 15  | How indeterminate index test or reference                                                                                                              | Described in methods for LFIA devices (and                                                                                         |

| Section and topic | No  | Item                                                                                               | Inclusion in manuscript                                                                                                                                 |
|-------------------|-----|----------------------------------------------------------------------------------------------------|---------------------------------------------------------------------------------------------------------------------------------------------------------|
|                   |     | standard results were handled                                                                      | Figure 1C)                                                                                                                                              |
|                   | 16  | How missing data on the index test and reference standard were handled                             | Not applicable                                                                                                                                          |
|                   | 17  | Any analyses of variability in diagnostic accuracy, distinguishing pre-specified from exploratory  | Confidence intervals around point estimates provided in figure S1                                                                                       |
|                   | 18  | Intended sample size and how it was determined                                                     | Pragmatic sample size based on availability of LFIA devices stated. Estimate of numbers needed to increase power stated in discussion section.          |
| <b>Results</b>    |     |                                                                                                    |                                                                                                                                                         |
| Participants      | 19  | Flow of participants, using a diagram                                                              | 142 pre-pandemic samples + 40 COVID-positive samples described in methods section entitled 'samples'. Flow diagram not required to support description. |
|                   | 20  | Baseline demographic and clinical characteristics of participants                                  | Provided in Suppl table S1                                                                                                                              |
|                   | 21a | Distribution of severity of disease in those with the target condition                             | Provided in Suppl table S1                                                                                                                              |
|                   | 21b | Distribution of alternative diagnoses in those without the target condition                        | Not applicable                                                                                                                                          |
|                   | 22  | Time interval and any clinical interventions between index test and reference standard             | Time intervals for symptoms provided in Suppl Table S1. No clinical interventions in this study.                                                        |
| Test results      | 23  | Cross tabulation of the index test results (or their distribution) by the results of the reference | Subjects selected according to index test results; presented in Suppl Table S1.                                                                         |

| Section and topic        | No | Item                                                                                                  | Inclusion in manuscript                                                        |
|--------------------------|----|-------------------------------------------------------------------------------------------------------|--------------------------------------------------------------------------------|
|                          |    | standard                                                                                              |                                                                                |
|                          | 24 | Estimates of diagnostic accuracy and their precision (such as 95% confidence intervals)               | Provided in results; Table 1                                                   |
|                          | 25 | Any adverse events from performing the index test or the reference standard                           | Not applicable – laboratory work undertaken retrospectively on banked samples. |
| <b>Discussion</b>        |    |                                                                                                       |                                                                                |
|                          | 26 | Study limitations, including sources of potential bias, statistical uncertainty, and generalisability | Addressed in discussion.                                                       |
|                          | 27 | Implications for practice, including the intended use and clinical role of the index test             | Addressed in discussion.                                                       |
| <b>Other information</b> |    |                                                                                                       |                                                                                |
|                          | 28 | Registration number and name of registry                                                              | Not applicable                                                                 |
|                          | 29 | Where the full study protocol can be accessed                                                         | Fully study protocol provided within methods and supporting materials          |
|                          | 30 | Sources of funding and other support; role of funders                                                 | Sources of funding and role of funders included in manuscript                  |
